# Supplementary material for: A Controlled Human Infection Model of Group A Streptococcus Pharyngitis: Which Strain and Why?
Source: PubMed Central journal article supplement (PMC6374595; doi:10.1128/msphere.00647-18), 2019-02-13

Figure S1

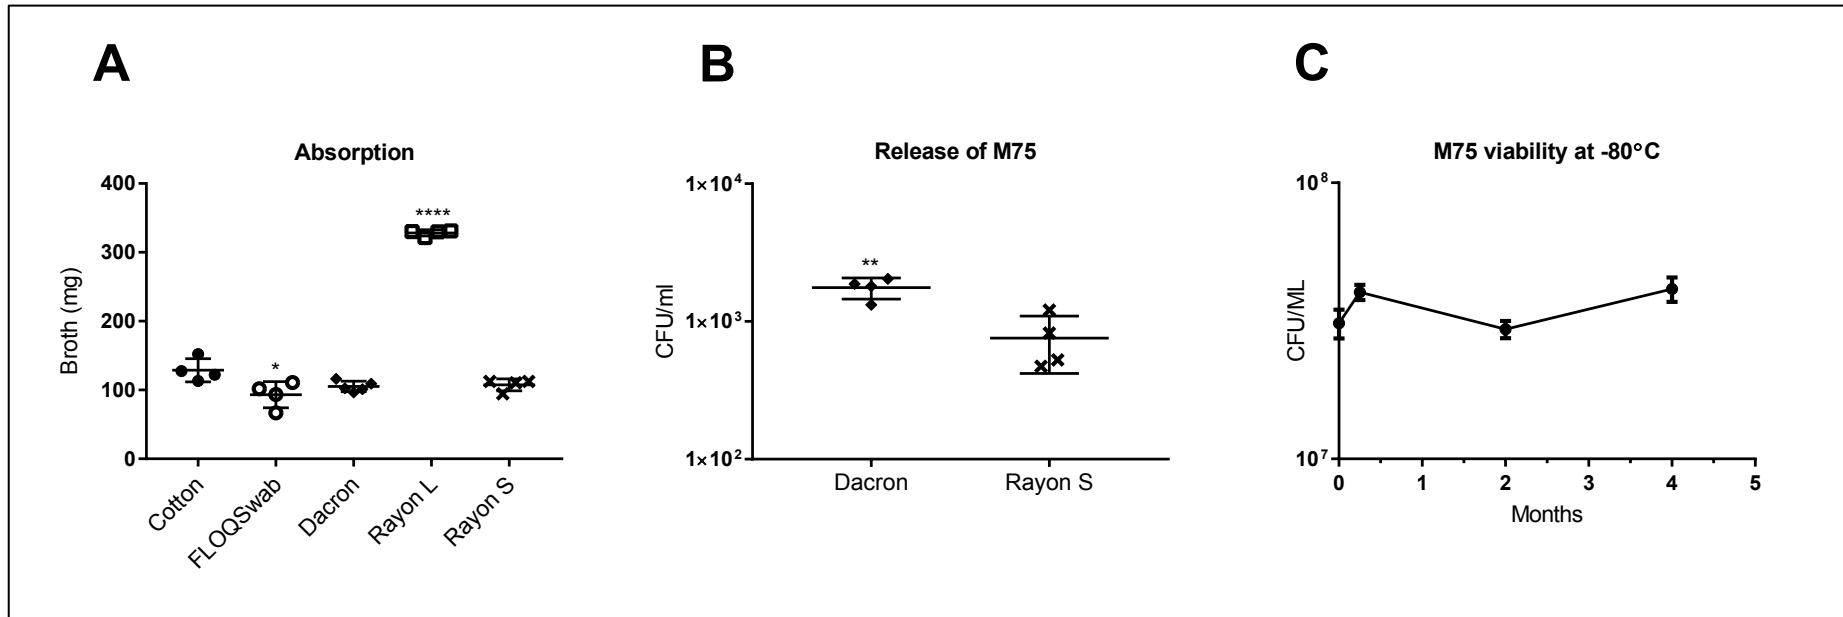

Supplement: mSphere.00647-18-sf001.pdf [file mSphere.00647-18-sf001.pdf]
